# Supplementary material for: Chidamide and apatinib are therapeutically synergistic in acute myeloid leukemia stem and progenitor cells
Source: PubMed Central journal article supplement (PMC9112613; doi:10.1186/s40164-022-00282-1), 2022-05-17

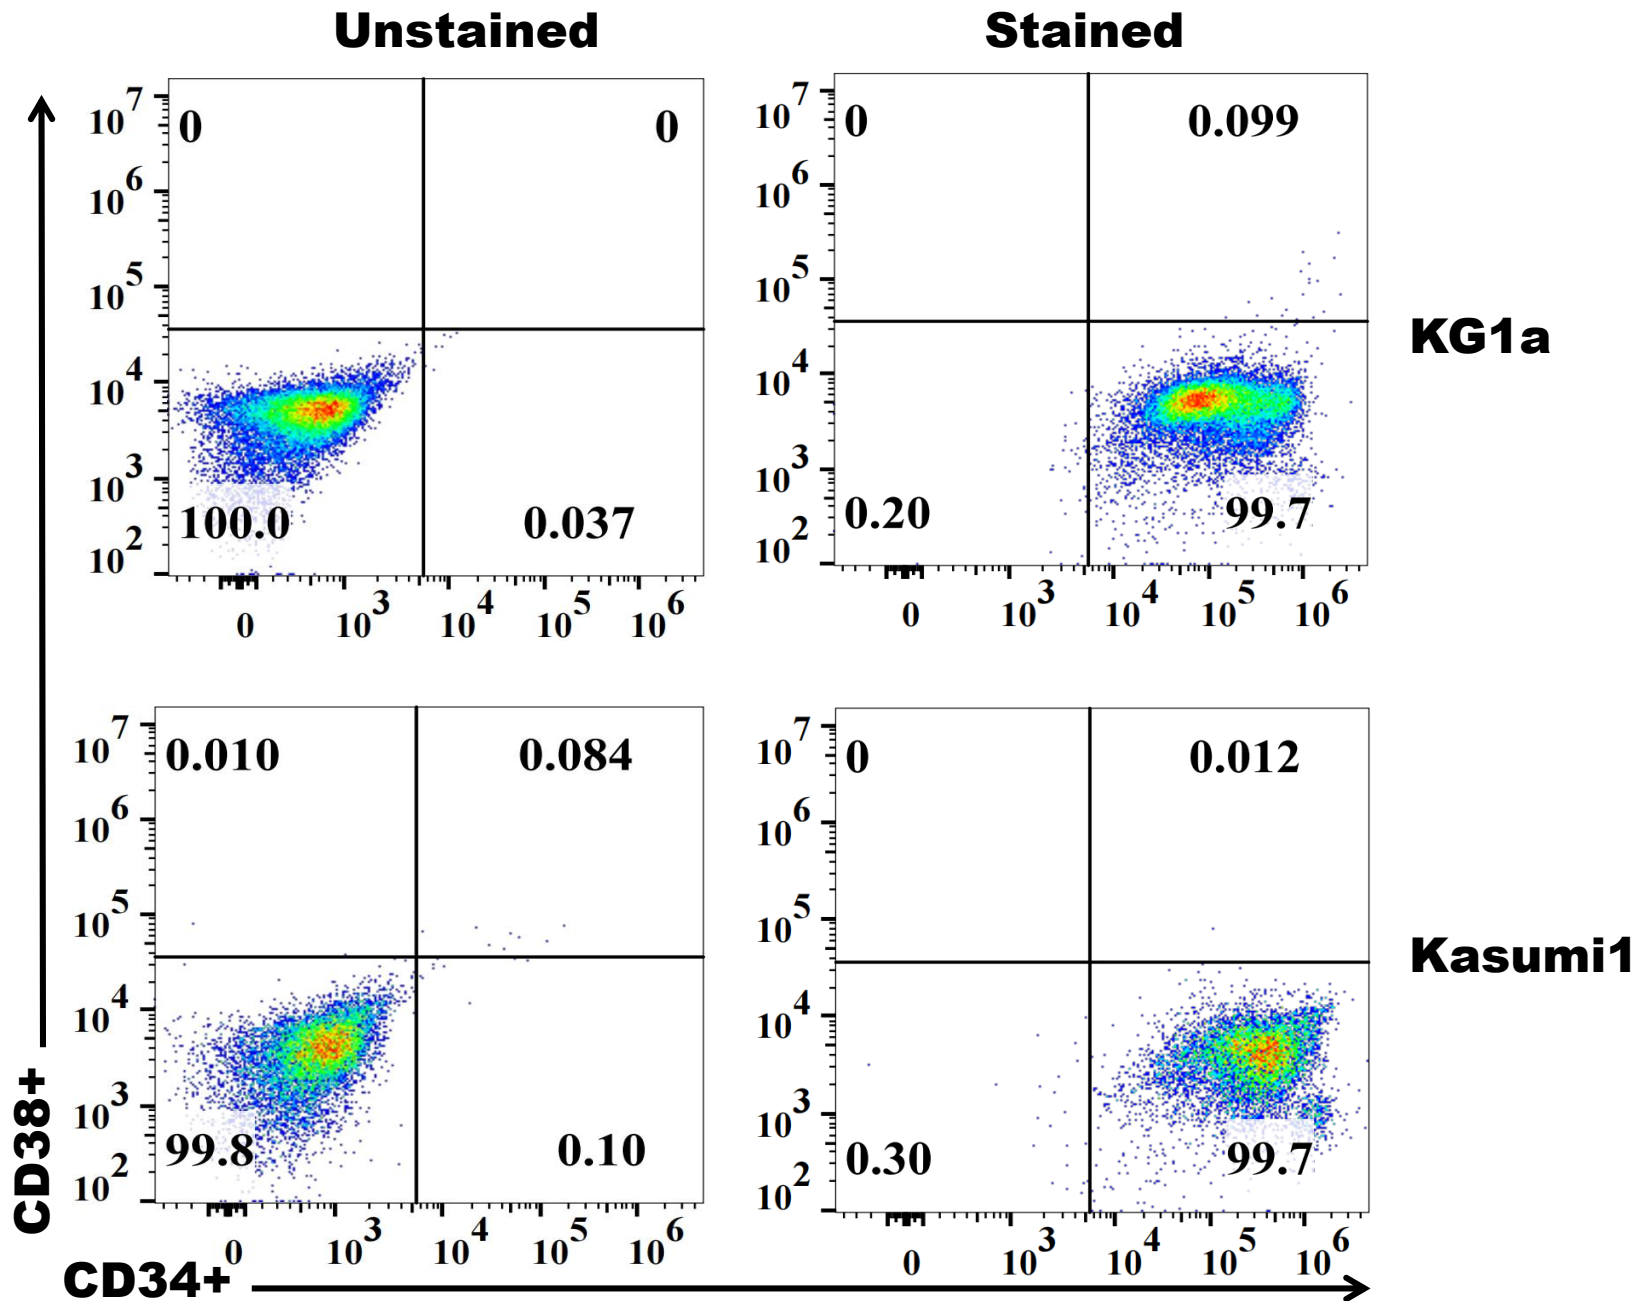

Supplement: 40164_2022_282_MOESM1_ESM.pdf [file 40164_2022_282_MOESM1_ESM.pdf]
